# Supplementary material for: Molecular evidence of SARS-CoV-2 in New York before the first pandemic wave
Source: PubMed Central journal article supplement (PMC8187428; doi:10.1038/s41467-021-23688-7), 2021-06-08
Supplement: 41467_2021_23688_MOESM1_ESM.pdf [file 41467_2021_23688_MOESM1_ESM.pdf]

1 **Molecular evidence of SARS-CoV-2 in New York before the first pandemic wave**

2

3 **SUPPLEMENTARY INFORMATION**

4

5 **Supplementary Fig. 1. Hospital distribution and SARS-CoV-2 quantitation of negative pools. a**

6 304 RPN pools were generated from nasopharyngeal swab specimens collected at distinct MSHS sites  
7 (A-E) from 30 December 2019 to 7 March 2020 (Hospital A, blue; B, red; C, green; D, purple; E,  
8 orange). **b** SARS-CoV-2 NAAT quantities in RPN pools by week. Cycle thresholds (Ct) of pools with  
9 detectable RNA by clinical diagnostic SARS-CoV-2 RT-PCR are depicted. If only the *ORF1ab* target or  
10 only the *E* gene target was detected in a pool, an X denotes the corresponding Ct value in green or red,  
11 respectively. If both targets were detected, the average of the Ct values of both detected targets is  
12 depicted by a blue circle for that pool.

13

14

# Supplementary Fig. 1

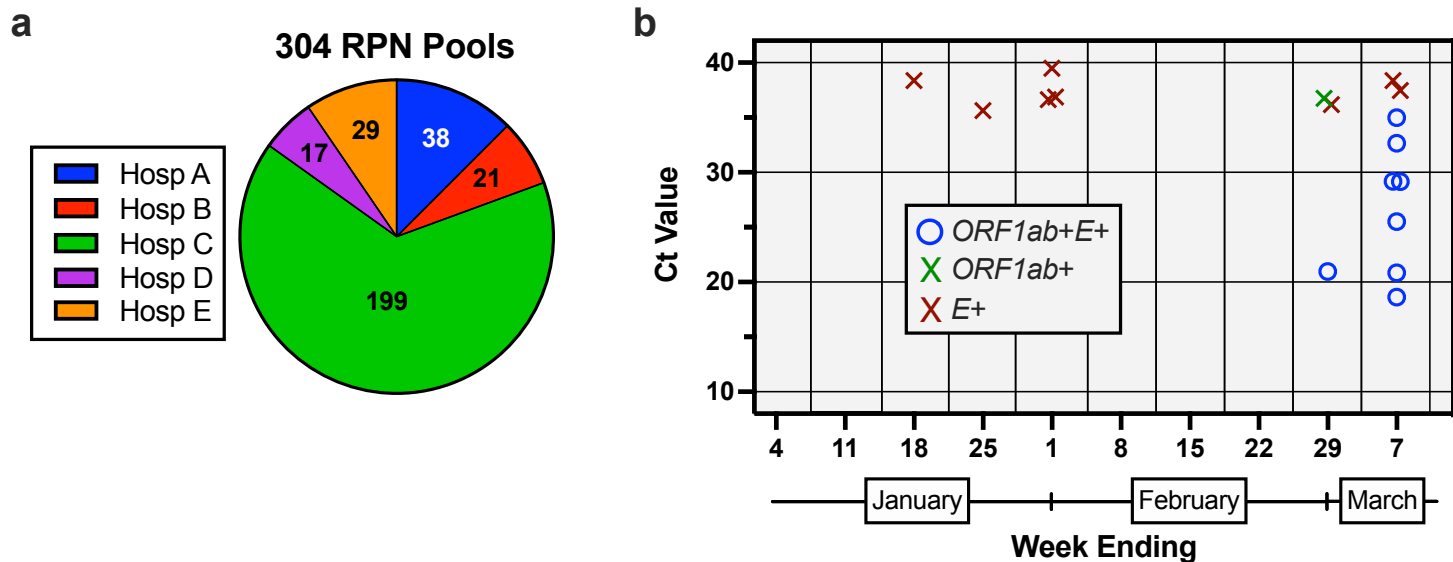

**Supplementary Fig. 1. Hospital distribution and SARS-CoV-2 quantitation of negative pools.** (A) 304 RPN pools were generated from nasopharyngeal swab specimens collected at distinct MSHS sites (A-E) from 30 December 2019 to 7 March 2020. (B) SARS-CoV-2 NAAT quantities in RPN pools by week. Cycle thresholds (Ct) of pools with detectable RNA by clinical diagnostic SARS-CoV-2 RT-PCR are depicted. If only the *ORF1ab* target or only the *E* gene target was detected in a pool, an X denotes the corresponding Ct value in green or red, respectively. If both targets were detected, the average of the Ct values of both detected targets is depicted by a blue circle for that pool.

15 **Supplementary Table 1. Total and SARS-CoV-2 mapped reads per library for RNP pools with**  
 16 **incomplete genomes**  
 17

| Result                     | RPN  | Ct Values<br>( <i>ORF1ab</i> , <i>E</i> ) <sup>a</sup> | Library <sup>b</sup> | Total reads | SARS-CoV-2 |     |           |        |
|----------------------------|------|--------------------------------------------------------|----------------------|-------------|------------|-----|-----------|--------|
|                            |      |                                                        |                      |             | Reads      | %   | Q30 reads | Q30 %  |
| <i>ORF1ab</i> +            | P34  | 36.75, ND                                              | Nextera XT           | 7965566     | 17443      | 0%  | 2545      | 0.03%  |
|                            |      |                                                        | Swift                | 1160563     | 73798      | 6%  | 3355      | 0.29%  |
|                            |      |                                                        | Swift-low            | 696604      | 42871      | 6%  | 6430      | 0.92%  |
| <i>ORF1ab</i> + <i>E</i> + | P51  | 34.25, 35.73                                           | Nextera XT           | 738641      | 28298      | 4%  | 24709     | 3.35%  |
| <i>ORF1ab</i> + <i>E</i> + | P58  | 31.66, 33.65                                           | Nextera XT           | 1795845     | 537177     | 30% | 505000    | 28.12% |
|                            |      |                                                        | Swift                | 1024048     | 70196      | 7%  | 36608     | 3.57%  |
|                            |      |                                                        | Swift-low            | 1130048     | 77639      | 7%  | 62833     | 5.56%  |
| <i>E</i> +                 | P263 | ND, 36.63                                              | Nextera XT           | 5187253     | 26720      | 1%  | 95        | 0.00%  |
|                            |      |                                                        | Swift                | 1491850     | 39336      | 3%  | 1905      | 0.13%  |
|                            |      |                                                        | Swift-low            | 1448665     | 8820       | 1%  | 121       | 0.01%  |
| <i>E</i> +                 | P271 | ND, 39.49                                              | Nextera XT           | 14412083    | 77720      | 1%  | 448       | 0.00%  |
|                            |      |                                                        | Swift                | 2291892     | 118264     | 5%  | 865       | 0.04%  |
|                            |      |                                                        | Swift-low            | 1130161     | 61587      | 5%  | 380       | 0.03%  |
| <i>E</i> +                 | P275 | ND, 35.63                                              | Nextera XT           | 5890208     | 44788      | 1%  | 28366     | 0.48%  |
|                            |      |                                                        | Swift                | 741823      | 44064      | 6%  | 333       | 0.04%  |
|                            |      |                                                        | Swift-low            | 864893      | 35945      | 4%  | 189       | 0.02%  |

18  
 19 a. If Ct value is not detected, “ND” is noted.  
 20 b. Nextera XT comprises data from both whole-genome and targeted custom amplicon sequencing library preparations.

21 **Supplementary Fig. 2. Maximum likelihood (ML) phylogenetic inference of seven SARS-CoV-2**  
22 **genome sequences from this surveillance study in a global background of 2,993 (same data as Fig.**  
23 **2).** Tip circles indicate the position of the respiratory pathogen-negative (RPN) pools (red) described in  
24 this report, the first reported COVID-19 case in New York City (green) from 29 February, later NYC  
25 cases from MSHS (yellow) and other institutions (dark grey), and US (blue) early isolates prior to 1  
26 March. Tips without circles correspond to the background global isolates. The yellow box delineates the  
27 position of the clade containing the majority of NYC sequences detected during the early spread. The  
28 PANGO lineage classification of the RPN pools is indicated by the dash lines, and the NextStrain clades  
29 are shown as node labels. Scale bar represents the number of nucleotide substitutions per site. The  
30 statistical support is indicated for the branches with bootstrap support values  $\geq 70\%$ .  
31

## Supplementary Fig. 2

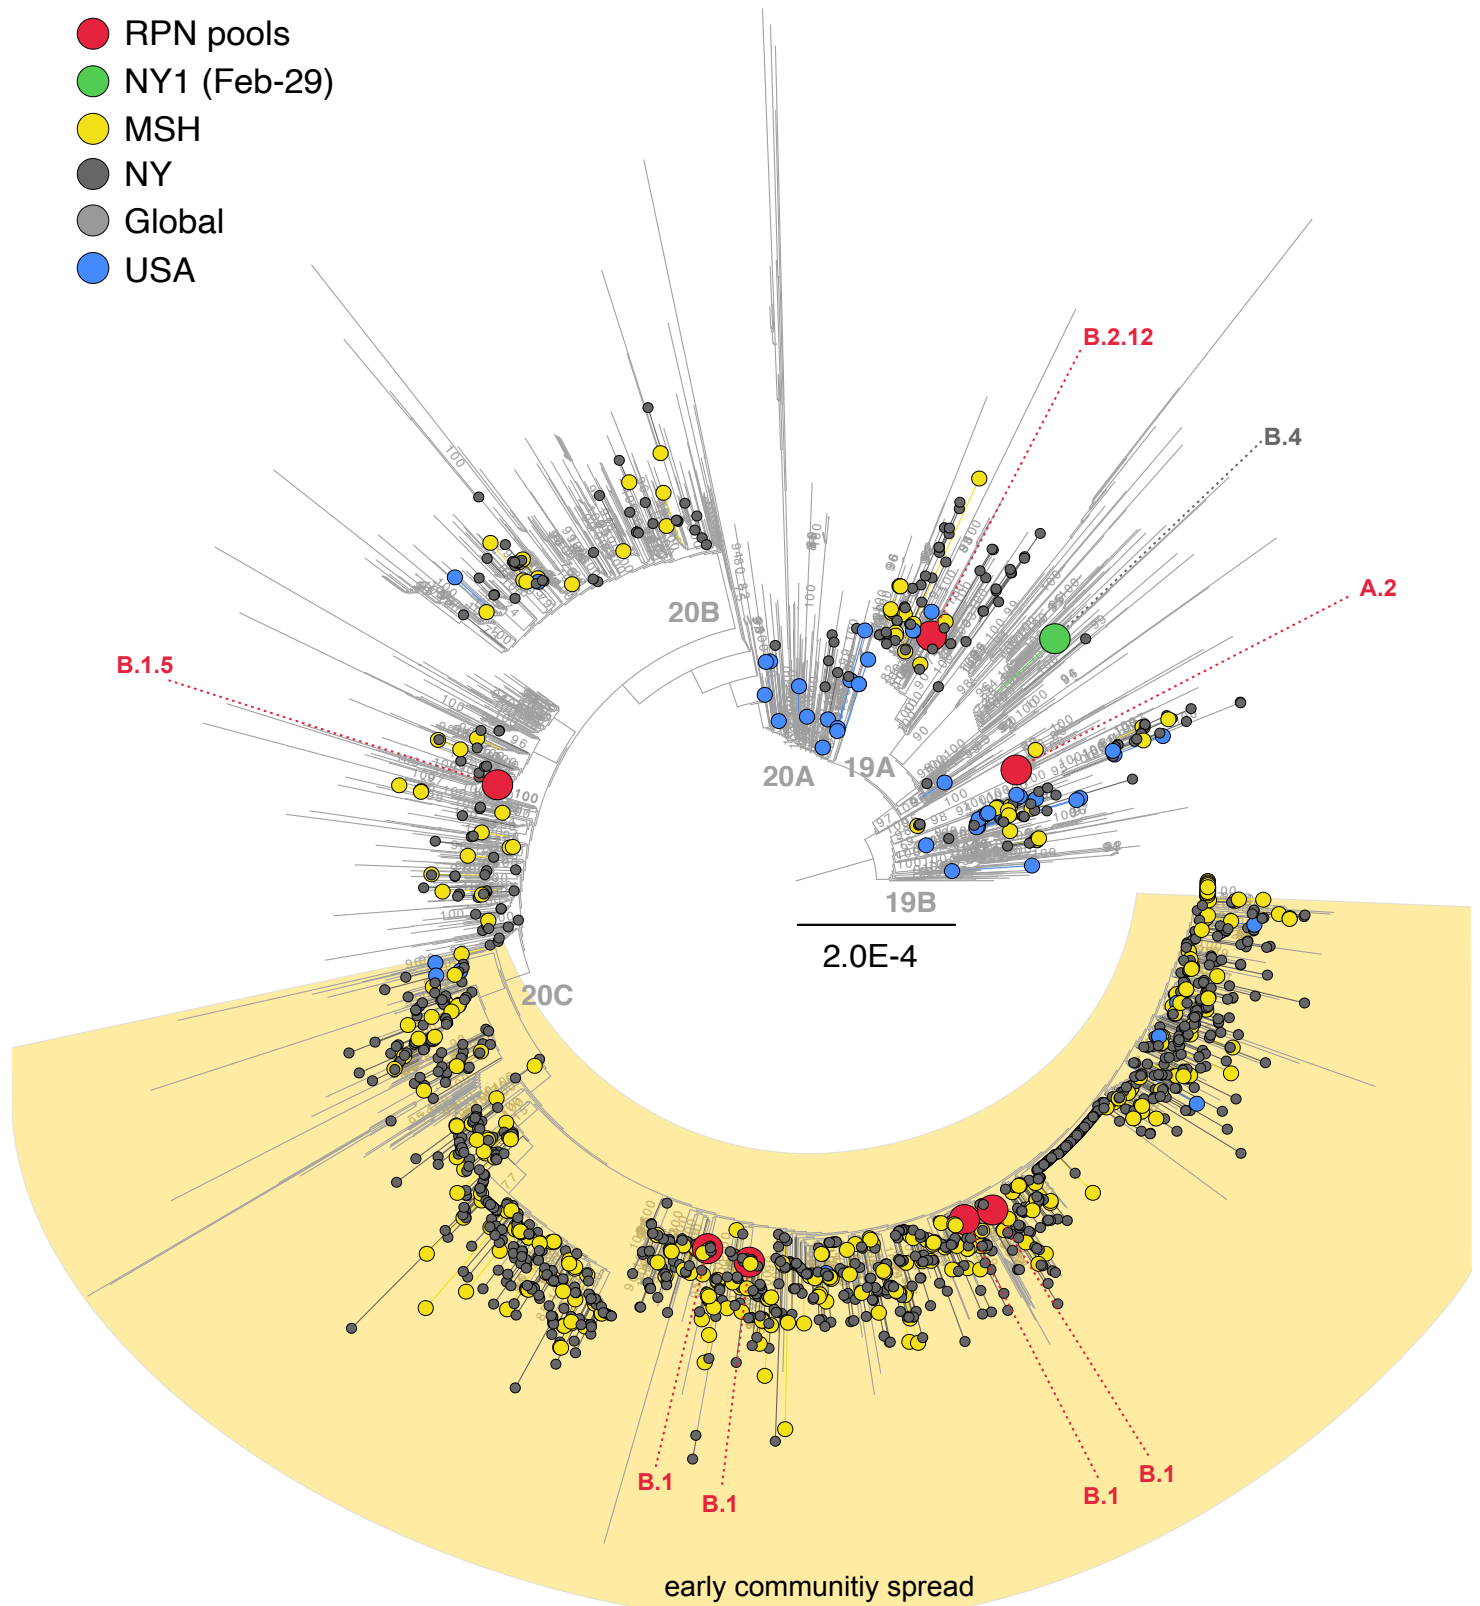

**Supplementary Fig. 2. Maximum likelihood (ML) phylogenetic inference of seven SARS-CoV-2 genome sequences from this surveillance study in a global background of 2,993 (same data as Fig. 2).** Tip circles indicate the position of the respiratory pathogen-negative (RPN) pools (red) described in this report, the first reported COVID-19 case in New York City (green) from 29 February, later NYC cases from MSHS (yellow) and other institutions (dark grey), and US (blue) early isolates prior to 1 March. Tips without circles correspond to the background global isolates. The yellow box delineates the position of the clade containing the majority of NYC sequences detected during the early spread. The PANGO lineage classification of the RPN pools is indicated by the dash lines, and the NextStrain clades are shown as node labels. Scale bar represents the number of nucleotide substitutions per site. The statistical support is indicated for the branches with bootstrap support values  $\geq 70\%$ .

32  
33  
34

## Supplementary Table 2

### SARS-CoV-2 primer sets for whole-genome amplification

| Name (1.5 Kb set)      | Sequence                       | Pool | Tm    |
|------------------------|--------------------------------|------|-------|
| covid19_1.5kb_1_LEFT   | ACCAACCAACTTTTCGATCTCTTGT      | 1    | 60.69 |
| covid19_1.5kb_1_RIGHT  | ATAGTGCGACCACCCTTACGAA         | 1    | 61.47 |
| covid19_1.5kb_2_LEFT   | CCACTTGCGAATTTTGTGGCAC         | 2    | 61.68 |
| covid19_1.5kb_2_RIGHT  | AGTAACCTTTGTTGGTGCACCG         | 2    | 61.58 |
| covid19_1.5kb_3_LEFT   | AGGAAGTTGTCTTGAAAACCTGGTGA     | 1    | 60.81 |
| covid19_1.5kb_3_RIGHT  | CAGCGATCTTTTGTTCAACTTGCT       | 1    | 60.79 |
| covid19_1.5kb_4_LEFT   | TCAGCACGAAGTTCTACTTGCA         | 2    | 60.22 |
| covid19_1.5kb_4_RIGHT  | AGTTGGACCAAACCTGTTGTCCA        | 2    | 60.29 |
| covid19_1.5kb_5_LEFT   | CCTATTCTGGACAATCTACACAACCTAGG  | 1    | 60.89 |
| covid19_1.5kb_5_RIGHT  | GATTATCCATTCCCTGCGCGTC         | 1    | 61.75 |
| covid19_1.5kb_6_LEFT   | TGGCTATTGATTATAAACACTACACACCC  | 2    | 61.49 |
| covid19_1.5kb_6_RIGHT  | ACTGTAGTGACAAGTCTCTCGCA        | 2    | 61.3  |
| covid19_1.5kb_7_LEFT   | GCAATTGTTTTTCAGCTATTTTGCAGT    | 1    | 60.27 |
| covid19_1.5kb_7_RIGHT  | AGTGTACTCTATAAGTTTTGATGGTGTGT  | 1    | 60.73 |
| covid19_1.5kb_8_LEFT   | ACAAGGCTATTGATGGTGGTGTCT       | 2    | 60.69 |
| covid19_1.5kb_8_RIGHT  | AGCATGTCTTCAGAGGTGCAGA         | 2    | 61.68 |
| covid19_1.5kb_9_LEFT   | GTTCTTTACCAACCACCACAAACC       | 1    | 60.68 |
| covid19_1.5kb_9_RIGHT  | GTCCACACTCTCCTAGCACCAT         | 1    | 61.48 |
| covid19_1.5kb_10_LEFT  | ACCTTCTCTTGCCACTGTAGCT         | 2    | 61.35 |
| covid19_1.5kb_10_RIGHT | TCTGTCTAGTGCAACAGGACT          | 2    | 61.33 |
| covid19_1.5kb_11_LEFT  | TGGTACAACATTTACTTATGCATCAGC    | 1    | 60.42 |
| covid19_1.5kb_11_RIGHT | AATACCAGCATTTTCGCATGGCA        | 1    | 61.53 |
| covid19_1.5kb_12_LEFT  | GGCATTTTGTATGAAGGTAATTGTGACA   | 2    | 61    |
| covid19_1.5kb_12_RIGHT | AACATGTTGTGCCAACCACCAT         | 2    | 61.55 |
| covid19_1.5kb_13_LEFT  | ACGTAATGTCATCCCTACTATAACTCAA   | 1    | 60.18 |
| covid19_1.5kb_13_RIGHT | ACAACCTGGAGCATTGCAAACA         | 1    | 61.54 |
| covid19_1.5kb_14_LEFT  | TGAGGCTATGTACACACCCGCAT        | 2    | 61.8  |
| covid19_1.5kb_14_RIGHT | CCGAGGAACATGTCTGGACCTA         | 2    | 61.21 |
| covid19_1.5kb_15_LEFT  | TCTTTGATGAAATTTCAATGGCCACA     | 1    | 60.46 |
| covid19_1.5kb_15_RIGHT | TGTCTGAAGCAGTGGAAAAGCA         | 1    | 60.68 |
| covid19_1.5kb_16_LEFT  | GGACTTCCTTGGAAATGTAGTGCG       | 2    | 61.48 |
| covid19_1.5kb_16_RIGHT | CAGTGAGTGGTGCACAAATCGT         | 2    | 61.63 |
| covid19_1.5kb_17_LEFT  | AATGTAGCATTTGAGCTTTGGGC        | 1    | 60.37 |
| covid19_1.5kb_17_RIGHT | TAACAAAGGCTGTCCACCATGC         | 1    | 61.4  |
| covid19_1.5kb_18_LEFT  | GGATCTCATTATTAGTGATATGTACGACCC | 2    | 61.07 |
| covid19_1.5kb_18_RIGHT | GGTCAAGTGCACAGTCTACAGC         | 2    | 61.44 |
| covid19_1.5kb_19_LEFT  | TGGTAGATTTGCCAATAGGTATTAACATCA | 1    | 61.04 |
| covid19_1.5kb_19_RIGHT | TGACTAGCTACACTACGTGCC          | 1    | 61.52 |
| covid19_1.5kb_20_LEFT  | AGTCCCTGTTGCTATTCATGCA         | 2    | 60.03 |

|                          |                               |             |           |
|--------------------------|-------------------------------|-------------|-----------|
| covid19_1.5kb_20_RIGHT   | CATGACAAATGGCAGGAGCAGT        | 2           | 61.46     |
| covid19_1.5kb_21_LEFT    | AGCTGCAGAAATCAGAGCTTCT        | 1           | 60.03     |
| covid19_1.5kb_21_RIGHT   | ACATGTTCAACACCAGTGTCTGT       | 1           | 60.62     |
| covid19_1.5kb_22_LEFT    | TGCTGGCATACTAATTGTTACGACT     | 2           | 60.63     |
| covid19_1.5kb_22_RIGHT   | TCAATCTCCATTGGTTGCTCTTCA      | 2           | 60.51     |
| covid19_1.5kb_23_LEFT    | TGCTTTGCTTGTACAGTAAGTGACA     | 1           | 61.14     |
| covid19_1.5kb_23_RIGHT   | TAGCACCATAGGGAAGTCCAGC        | 1           | 61.55     |
| covid19_1.5kb_24_LEFT    | GGCCCCAAGGTTTACCCAATAA        | 2           | 60.56     |
| covid19_1.5kb_24_RIGHT   | TAGGCAGCTCTCCCTAGCATTG        | 2           | 61.61     |
| <b>Name (2.0 Kb set)</b> | <b>Sequence</b>               | <b>Pool</b> | <b>Tm</b> |
| covid19_2kb_1_LEFT       | ACCAACCAACTTTCGATCTCTTGT      | 1           | 60.69     |
| covid19_2kb_1_RIGHT      | ACACCACCTGTAATGTAGGCCA        | 1           | 61.36     |
| covid19_2kb_2_LEFT       | GGTGCCTGGAATATTGGTGAACA       | 2           | 61.13     |
| covid19_2kb_2_RIGHT      | GCCGACAACATGAAGACAGTGT        | 2           | 61.38     |
| covid19_2kb_3_LEFT       | TGGAACTTACACCAGTTGTTTCAGAC    | 1           | 61.14     |
| covid19_2kb_3_RIGHT      | AGCATCTTGTAGAGCAGGTGGA        | 1           | 61.16     |
| covid19_2kb_4_LEFT       | AACCTCATAATTCACATGAAGGTAACA   | 2           | 60.03     |
| covid19_2kb_4_RIGHT      | AAAACACNTAAAGCAGCGGTTGA       | 2           | 61.49     |
| covid19_2kb_5_LEFT       | AAACCGTGTGTTGACTAATTATATGCCTT | 1           | 60.13     |
| covid19_2kb_5_RIGHT      | TCACGAGTGACACCACCATCAA        | 1           | 61.86     |
| covid19_2kb_6_LEFT       | ACGAAAACAAATACGTAGTGCTGC      | 2           | 60.61     |
| covid19_2kb_6_RIGHT      | TGGGCCTCATAGCACATTGGTA        | 2           | 61.5      |
| covid19_2kb_7_LEFT       | TCTGAAGACATGCTTAACCCTAATTATGA | 1           | 60.59     |
| covid19_2kb_7_RIGHT      | ATCACCATTAGCAACAGCCTGC        | 1           | 61.53     |
| covid19_2kb_8_LEFT       | ATTGTGGGCTCAATGTGTCCAG        | 2           | 61.14     |
| covid19_2kb_8_RIGHT      | AGCATAGACGAGGTCTGCCATT        | 2           | 61.54     |
| covid19_2kb_9_LEFT       | GCTAAATTCCTAAAACTAATTGTTGTCGC | 1           | 60.82     |
| covid19_2kb_9_RIGHT      | TGCATTAACATTGGCCGTGACA        | 1           | 61.4      |
| covid19_2kb_10_LEFT      | CCTAAATGTGATAGAGCCATGCCT      | 2           | 60.51     |
| covid19_2kb_10_RIGHT     | TGCGAGCAGAAGGGTAGTAGAG        | 2           | 61.27     |
| covid19_2kb_11_LEFT      | TGTTGGTGATTATTTTGTGCTGACAT    | 1           | 60.24     |
| covid19_2kb_11_RIGHT     | CAAAGCACTCGTGGACAGCTAG        | 1           | 61.49     |
| covid19_2kb_12_LEFT      | CTGAGCGCACCTGTTGTCTATG        | 2           | 61.56     |
| covid19_2kb_12_RIGHT     | TGAACCTGTTTGCGCATCTGTT        | 2           | 61.59     |
| covid19_2kb_13_LEFT      | ACCCAGGAGTCAAATGGAAATTGA      | 1           | 60.45     |
| covid19_2kb_13_RIGHT     | CCTGAGGGAGATCACGCACTAA        | 1           | 61.53     |
| covid19_2kb_14_LEFT      | CAATTTTGTAAATGATCCATTTTGGGTGT | 2           | 60.29     |
| covid19_2kb_14_RIGHT     | TGCTGCATTCAGTTGAATCACCA       | 2           | 61.31     |
| covid19_2kb_15_LEFT      | ACCCATTGGTGCAGGTATATGC        | 1           | 60.75     |
| covid19_2kb_15_RIGHT     | TGCAGTAGCGGAACAAAATCT         | 1           | 61.44     |
| covid19_2kb_16_LEFT      | CCATAGTAATGGTGACAATTATGCTTTGC | 2           | 61.57     |
| covid19_2kb_16_RIGHT     | AGCGTTCGTGATGTAGCAACAG        | 2           | 61.49     |
| covid19_2kb_17_LEFT      | TGTGGCTCAGCTACTTCATTGC        | 1           | 61.2      |

|                      |                        |   |       |
|----------------------|------------------------|---|-------|
| covid19_2kb_17_RIGHT | TAGCACCATAGGGAAGTCCAGC | 1 | 61.55 |
| covid19_2kb_18_LEFT  | ACTTGTACGCCTAAACGAACA  | 2 | 60.74 |
| covid19_2kb_18_RIGHT | TAGGCAGCTCTCCCTAGCATTG | 2 | 61.61 |

35

36
